# Supplementary material for: Striking solvent dependence of total emission and circularly polarised luminescence in coordinatively saturated chiral europium complexes: solvation significantly perturbs the ligand field
Source: Royal Society of Chemistry journal article supplement (doi:10.1039/d1cp01686e), 2021-01-01
Supplement: d1cp01686e1.pdf [file d1cp01686e1.pdf]

### Supplementary Information

## Striking Solvent Dependence of Total Emission and Circularly Polarised Luminescence in Coordinatively Saturated Chiral Europium Complexes: Solvation Significantly Perturbs the Ligand Field

Jack D. Fradgley, Andrew T. Frawley, Robert Pal and David Parker\*

Department of Chemistry, Durham University, South Road, Durham DH1 3LE, UK

**Table S1**

| Solvent                               | Reichardt solvent polarity parameter, $E_T^N$ | Viscosity at 25 °C / mPa s |
|---------------------------------------|-----------------------------------------------|----------------------------|
| Water                                 | 1.000                                         | 0.890                      |
| 2,2,2-Trifluoroethanol (TFE)          | 0.898                                         | 1.84                       |
| Methanol (MeOH)                       | 0.762                                         | 0.544                      |
| Ethanol (EtOH)                        | 0.654                                         | 1.074                      |
| Isopropanol ( <i>i</i> PrOH)          | 0.546                                         | 2.038                      |
| Acetonitrile (MeCN)                   | 0.460                                         | 0.369                      |
| Dimethylsulfoxide (DMSO)              | 0.444                                         | 1.987                      |
| <i>N,N</i> -Dimethylformamide (DMF)   | 0.404                                         | 0.794                      |
| <i>Tert</i> -butanol ( <i>t</i> BuOH) | 0.389                                         | 4.312                      |
| Acetone                               | 0.355                                         | 0.306                      |
| Dichloromethane (DCM)                 | 0.309                                         | 0.413                      |
| Chloroform                            | 0.259                                         | 0.537                      |

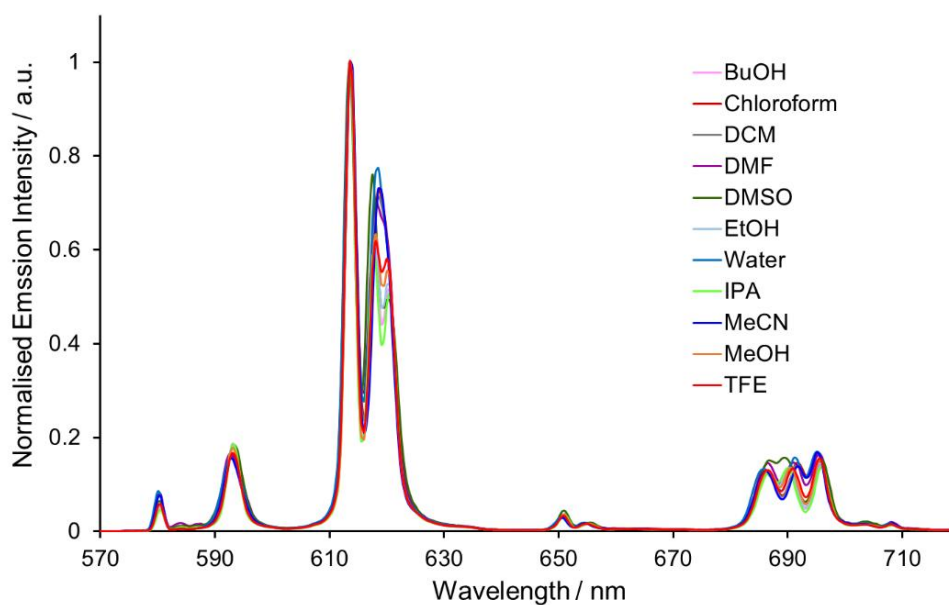

**Figure S1** Total emission spectra of [EuL<sup>1</sup>] in various solvents after addition of TFA (295 K, excitation at the absorption maximum value in each solvent).

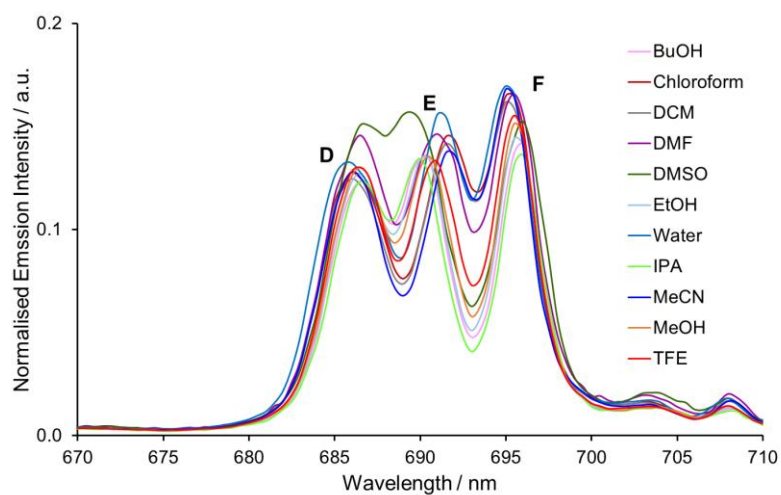

**Figure S2** Expanded emission spectra of [EuL<sup>1</sup>] in various solvents following addition of TFA, showing the  $\Delta J = 4$  manifold. Transitions are labelled as described in the text.

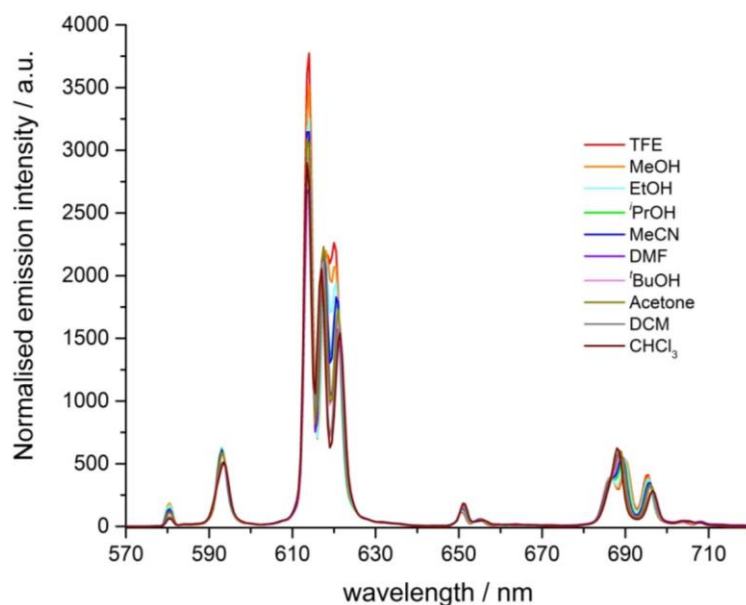

**Figure S3a** The total emission spectra of  $[\text{EuL}^2]$  in the stated solvents (295 K, excitation at absorption maximum). Spectra are normalised to the emission intensity of  $\Delta J = 1$  manifold.

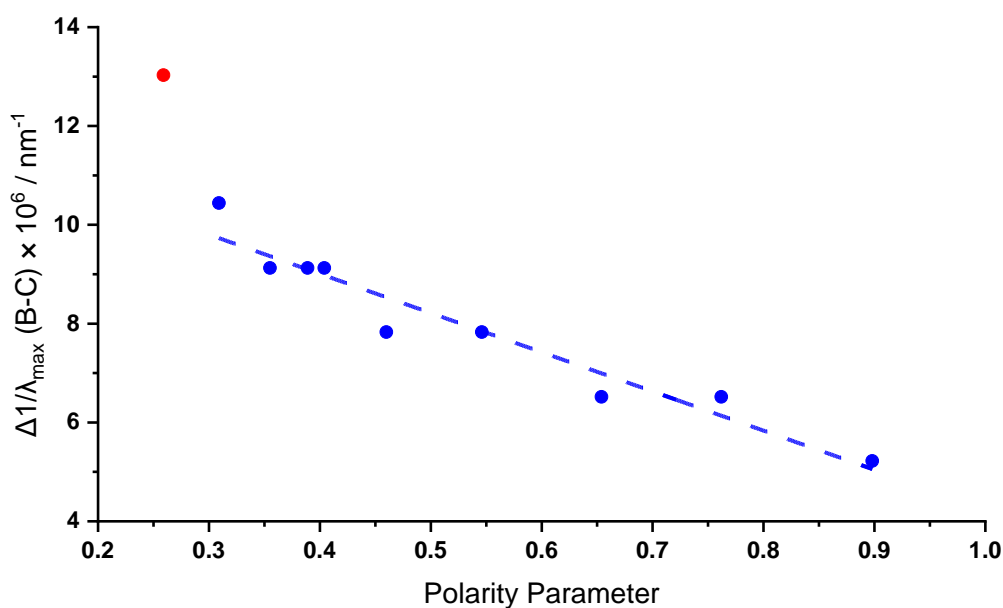

**Figure S3b** Plot of the difference in frequency of the B and C  $\Delta J = 2$  transitions as a function of the normalised Reichardt polarity parameter, in  $[\text{EuL}^2]$  ( $R^2 = 0.93$ ). The fit excludes the point for chloroform (shown in red) due to the anomalous behaviour seen specifically for this solvent (see discussion in main text).

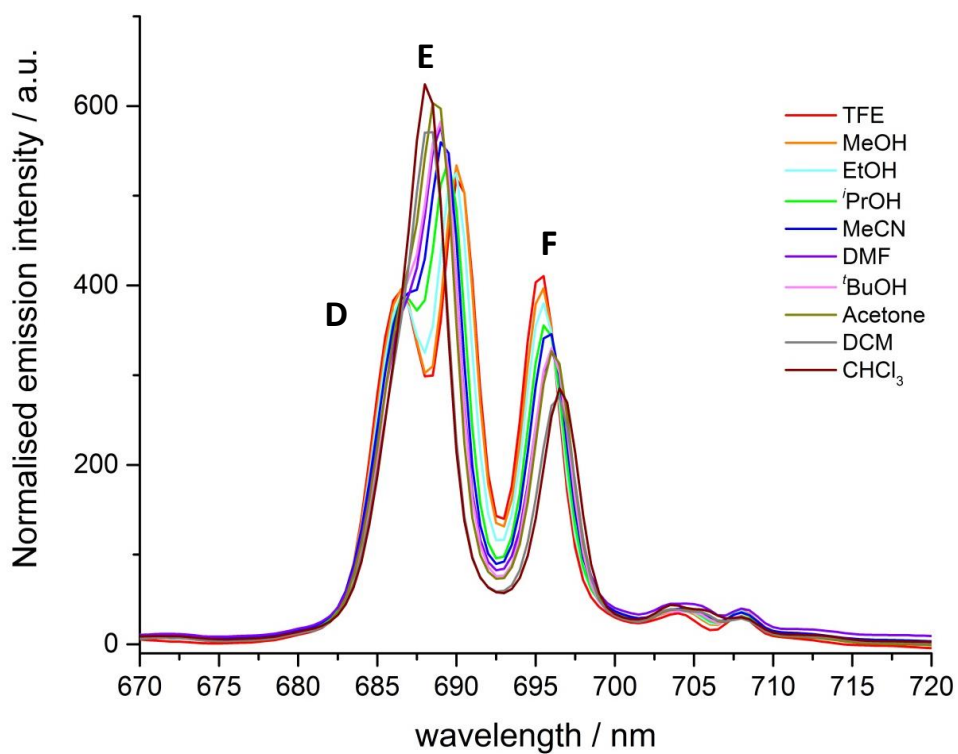

**Figure S4** Expanded emission spectra of  $[\text{EuL}^2]$  in various solvents in the  $\Delta J = 4$  manifold. Transitions are labelled as described in the text.

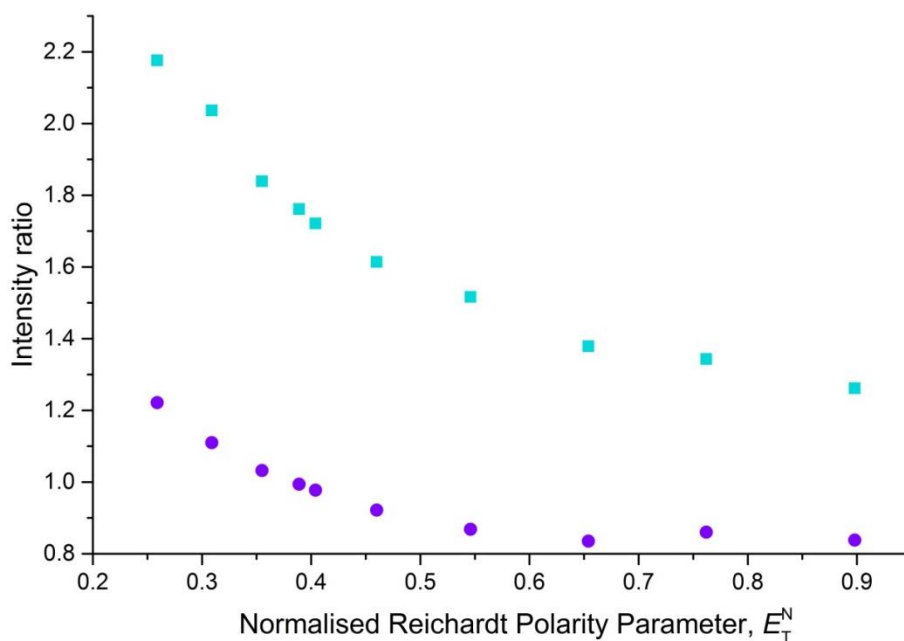

**Figure S5** Ratios of the intensity of emissive transitions E vs. F (*light blue*) and E vs.  $\Delta J = 1$  at 593 nm (*purple*) as a function of solvent polarity for  $[\text{EuL}^2]$ .

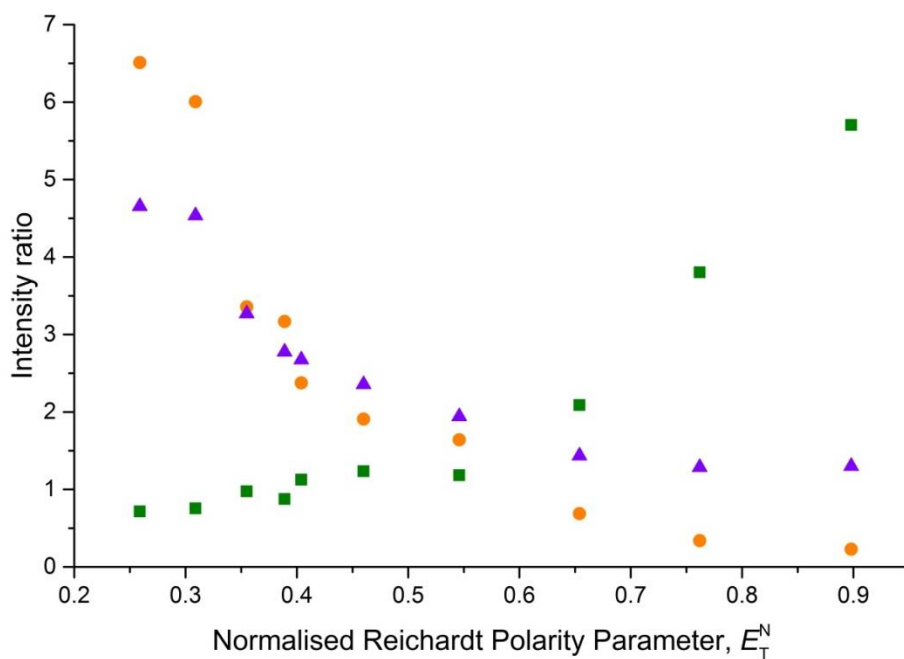

**Figure S6** Ratios of the intensity of various CPL transitions as a function of solvent polarity for  $[\text{EuL}^2]$ : 593 nm / 613 nm (*green*); 593 nm / 690 nm (*purple*); and 613 nm / 690 nm (*orange*).

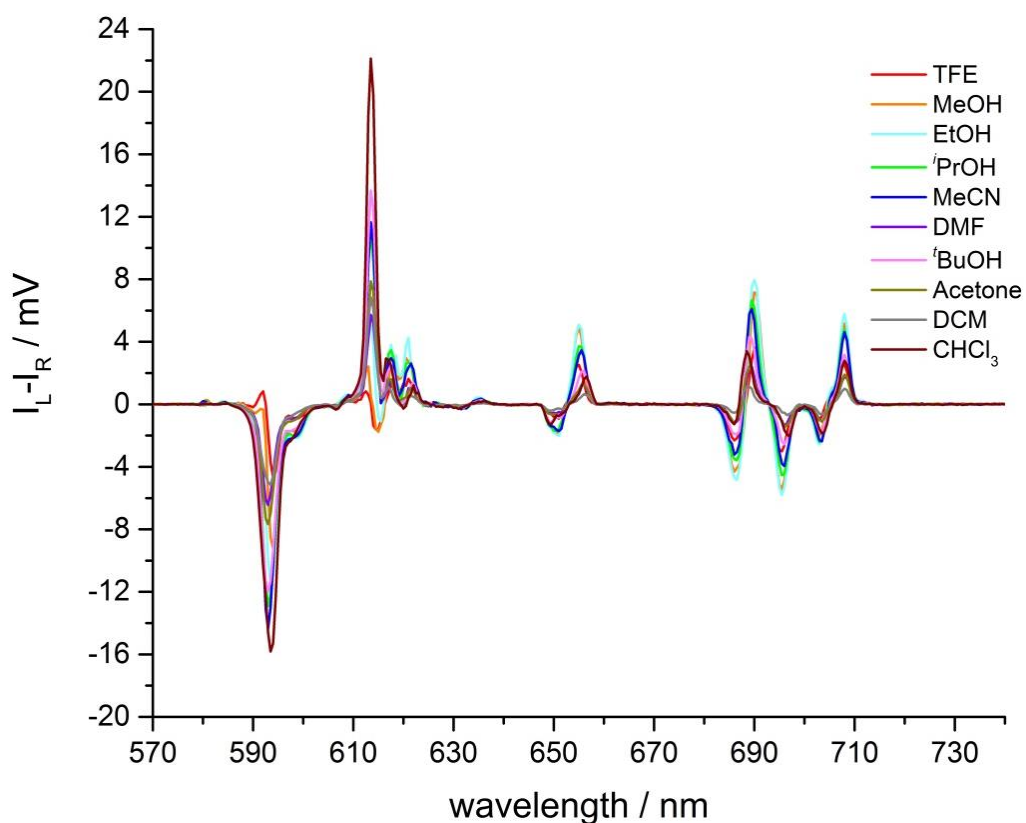

**Figure S7** Circularly polarised emission spectra of  $\Lambda$ - $[\text{EuL}^2]$  in various solvents (295 K, excitation at absorption maximum in each solvent). Spectra are not normalised.

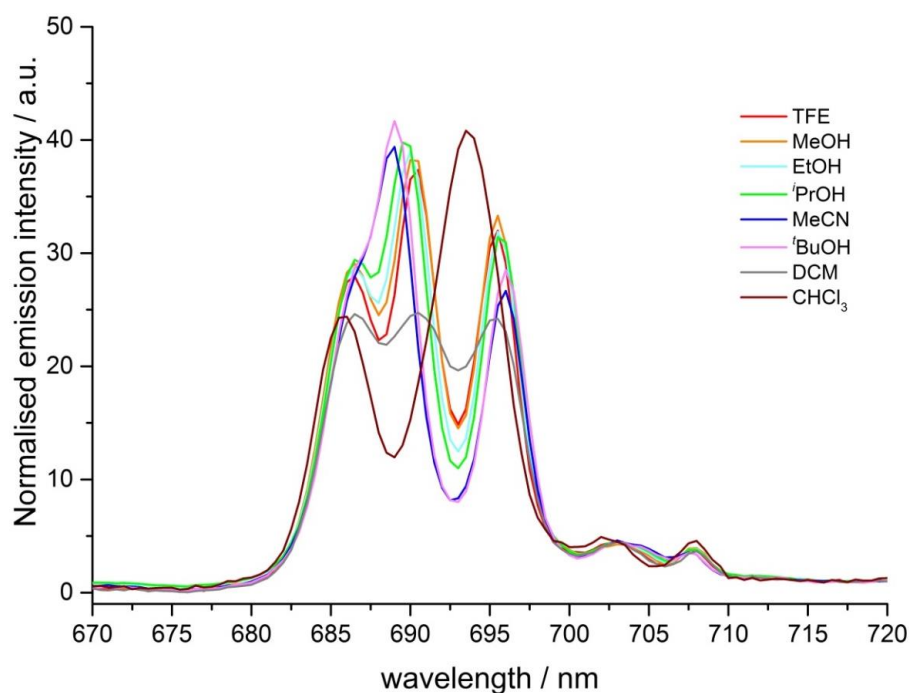

**Figure S8** Solvent dependence of emission of  $[\text{EuL}^3]$  in the  $\Delta J = 4$  manifold.

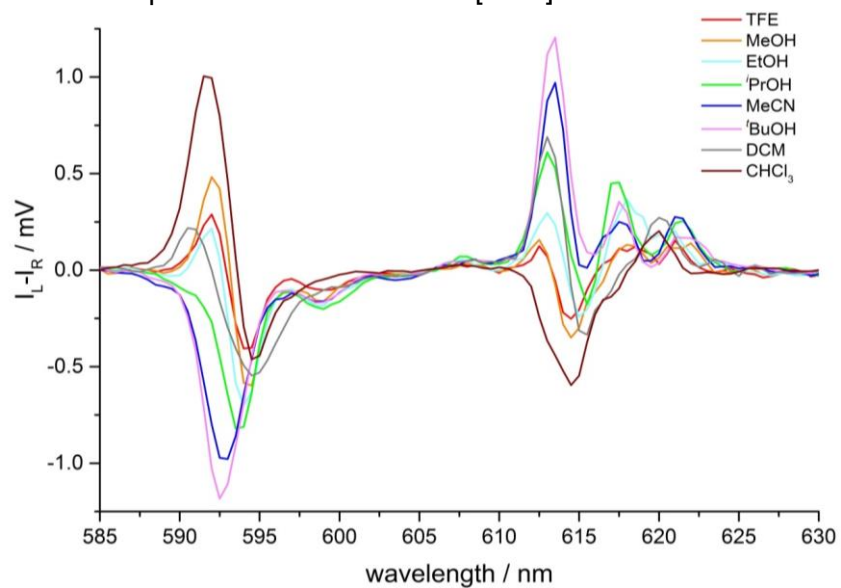

**Figure S9** Expanded circularly polarised emission spectra of  $\Lambda$ - $[\text{EuL}^3]$  in various solvents highlighting the  $\Delta J = 1$  and 2 manifolds, where sign inversion was observed.

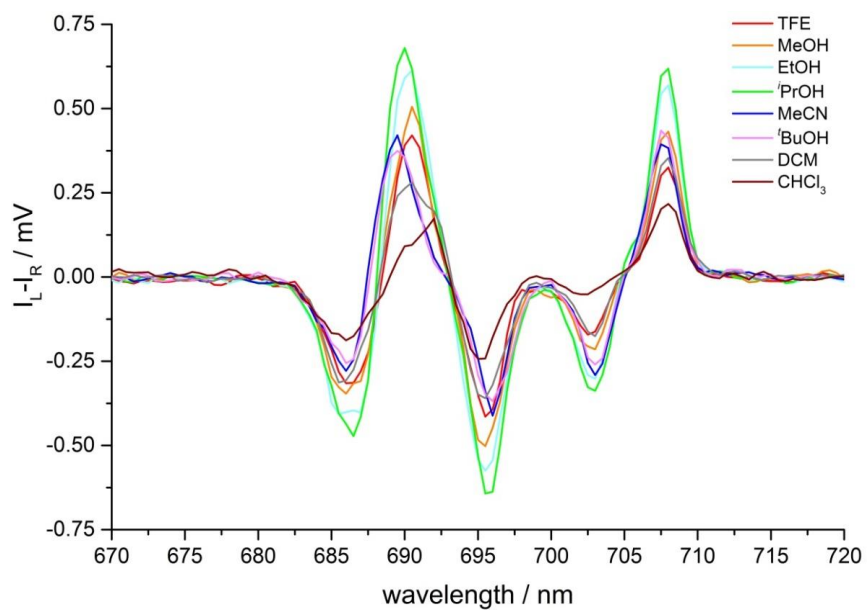

**Figure S10** Expanded circularly polarised emission spectra of  $\Lambda$ -[EuL<sup>3</sup>] in various solvents examining the  $\Delta J = 4$  manifold.
